# Supplementary material
Source: HighWire-hosted journal article supplement (https://bmjopen.bmj.com/content/10/9/e036735)
Supplement: inline-supplementary-material-1 [file inline-supplementary-material-1.pdf]

***Appendix 1: Participating hospitals***

Erasmus MC Rotterdam

Albert Schweizer Hospital Dordrecht

Maastad Hospital Rotterdam

IJsselland Hospital Capelle aan den IJssel

Ikazia Hospital Rotterdam

Franciscus Gasthuis Rotterdam

As of July 2019 two additional ICUs have started recruitment:

Jeroen Bosch Hospital, 's-Hertogenbosch

Radboud University Medical Center, Nijmegen
