# Supplementary material
Source: HighWire-hosted journal article supplement (https://bmjopen.bmj.com/content/10/9/e036735)
Supplement: inline-supplementary-material-3 [file inline-supplementary-material-3.pdf]

**Appendix 3: Haloperidol SPC**

See this weblink: <https://db.cbg-meb.nl/IB-teksten/h03185.pdf>
