# Supplementary material
Source: HighWire-hosted journal article supplement (https://bmjopen.bmj.com/content/10/9/e036735)
Supplement: inline-supplementary-material-7 [file inline-supplementary-material-7.pdf]

1 **Appendix 7: Unblinding Procedure**

2 The study treatment will be unblinded after Database Lock. While the safety of patients should  
3 always take priority, maintenance of blinding is crucial to the integrity of a double-blind trial. Before  
4 this planned unblinding, the blinding for a specific patient should only be broken when information  
5 about the patient's protocol treatment is considered necessary to manage Serious Adverse Events  
6 (emergency unblinding). Unblinding procedures should preferably be initiated only after consultation  
7 of the principal investigator/coordinating investigator or his/her representative. To initiate an  
8 emergency unblinding the pharmacy in charge of the randomisation list should be contacted.  
9 Breaking the blinding on a patient will be logged and reported to the coordinating Investigator within  
10 24 hours following the unblinding procedure, using the Emergency Unblinding Form. It is considered  
11 a major protocol violation, after which the patient goes off protocol treatment (if applicable).
